# Supplementary material for: Introgression of chromosomal segments conferring early heading date from wheat diploid progenitor, Aegilops tauschii Coss., into Japanese elite wheat cultivars
Source: PubMed Central journal article supplement (PMC6984701; doi:10.1371/journal.pone.0228397), 2020-01-27
Supplement: pone.0228397.s001.pdf [file pone.0228397.s001.pdf]

S1 Table. Primer list and PCR conditions for the PCR analyses of wheat major genes

| Gene           | Primer           | Sequence (5'-3')               | Annealing temp (°C) | Elongation time (sec) | Cycle number |
|----------------|------------------|--------------------------------|---------------------|-----------------------|--------------|
| <i>VRN-A1</i>  | Ex1/C/F          | GTTCTCCACCGAGTCATGGT           | 55.6                | 40                    | 30           |
|                | Intr1/A/R3       | AAGTAAGACAACACGAATGTGAGA       |                     |                       |              |
| <i>vrn-A1</i>  | Intr1/C/F        | GCACTCCTAACCCACTAACC           | 56                  | 70                    | 30           |
|                | Intr1/AB/R       | TCATCCATCATCAAGGCAAA           |                     |                       |              |
| <i>VRN-B1</i>  | Intr1/B/F        | CAAGTGGAAACGGTTAGGACA          | 58                  | 50                    | 30           |
|                | Intr1/B/R3       | CTCATGCCAAAAATTGAAGATGA        |                     |                       |              |
| <i>vrn-B1</i>  | Intr1/B/F        | CAAGTGGAAACGGTTAGGACA          | 56.4                | 80                    | 30           |
|                | Intr1/B/R4       | CAAATGAAAAGGAATGAGAGCA         |                     |                       |              |
| <i>VRN-D1</i>  | Intr1/D/F        | GTTGTCTGCCTCATCAAATCC          | 61                  | 110                   | 30           |
|                | Intr1/D/R3       | GGTCACTGGTGGTCTGTGC            |                     |                       |              |
| <i>vrn-D1</i>  | Intr1/D/F        | GTTGTCTGCCTCATCAAATCC          | 61                  | 70                    | 30           |
|                | Intr1/D/R4       | AAATGAAAAGGAACGAGAGCG          |                     |                       |              |
| <i>VRN-A1a</i> | VRN-A1 hexa L    | CGGGCAAACGGAATCTACCA           | 68                  | 60                    | 30           |
|                | VRN-A1 hexa R    | TGGGGCATCGTGTGGCT              |                     |                       |              |
| <i>Ppd-A1a</i> | TaPpd-A1prodelF1 | CGTACTCCCTCCGTTTCTTT           | 55                  | 30                    | 35           |
|                | TaPpd-A1prodelR2 | GTTGGGGTCGTTTGGTGGTG           |                     |                       |              |
| <i>Ppd-A1b</i> | TaPpd-A1prodelF1 | CGTACTCCCTCCGTTTCTTT           | 55                  | 30                    | 35           |
|                | TaPpd-A1prodelR3 | AATTTACGGGGACCAAATACC          |                     |                       |              |
| <i>Ppd-B1</i>  | TaPpd-B1proF1    | ACACTAGGGCTGGTCGAAGA           | 64                  | 60                    | 35           |
|                | TaPpd-B1int1R1   | CCGAGCCAGTGCAAATTAAC           |                     |                       |              |
| <i>Ppd-D1a</i> | TaPpd-D1_F1      | ACGCCTCCCACTACTG               | 55                  | 30                    | 35           |
|                | TaPpd-D1_R2      | CACTGGTGGTAGCTGAGATT           |                     |                       |              |
| <i>Ppd-D1b</i> | TaPpd-D1_F1      | ACGCCTCCCACTACTG               | 55                  | 30                    | 35           |
|                | TaPpd-D1_R1      | TGTTGGTTCAAACAGAGAGC           |                     |                       |              |
| <i>Pina-D1</i> | Pina_F1          | GGTCAGATTCAGTACACGGAACATCACATA | 58                  | 30                    | 30           |
|                | Pina_aR1         | CTTTGCTTGCCCGATCACGCTG         |                     |                       |              |
|                | Pina_bR1         | TTCAAGGTCAATGGGCGCCACTATAA     |                     |                       |              |
| <i>Pinb-D1</i> | Pinb_F2          | CAACCCATCTATTCATCTCCACCACC     | 58                  | 30                    | 30           |
|                | Pinb_R2          | TCACCAGTAATAGCCACTAGGGAAC      |                     |                       |              |
|                | Pinb_bR1         | GGATGCTCACAGCCGCT              |                     |                       |              |
| <i>Glu-D1</i>  | GDx_F            | TTTGGGGAATACCTGCACTACTAAAAAGGT | 63                  | 30                    | 30           |
|                | GDx5_F           | AAAAGGTATTACCCAAGTGTAACCTGTCCG |                     |                       |              |
|                | GDx_R            | AATTGTCCTGGCTGCAGCTGCGA        |                     |                       |              |
| <i>Glu-B3</i>  | B3g-17           | CACAACAGCAACCATGTTAC           | 60                  | 50                    | 30           |
|                | B3g-02           | GGAATACCTTGCATGGGTTC           |                     |                       |              |
